# Supplementary material for: Solution-processable bipolar host materials composed of fluorenyl, carbazolyl and 1,3,4-oxadiazolyl derivatives: synthesis and application in phosphorescent organic light-emitting diodes
Source: Royal Society of Chemistry journal article supplement (doi:10.1039/c6tc01108j), 2016-01-01
Supplement: c6tc01108j1.pdf [file c6tc01108j1.pdf]

## Supplementary Information

### Solution-Processable Bipolar Host Materials Composed of Fluorenyl, Carbazolyl and 1,3,4-Oxadiazolyl Derivatives: Synthesis and Application in Phosphorescent Organic Light-Emitting Diodes

Tso-Hsing Fan and Yun Chen\*

Department of Chemical Engineering, National Cheng Kung University, No. 1, University Road, Tainan 701 Taiwan. \*E-mail: [yunchen@mail.ncku.edu.tw](mailto:yunchen@mail.ncku.edu.tw)

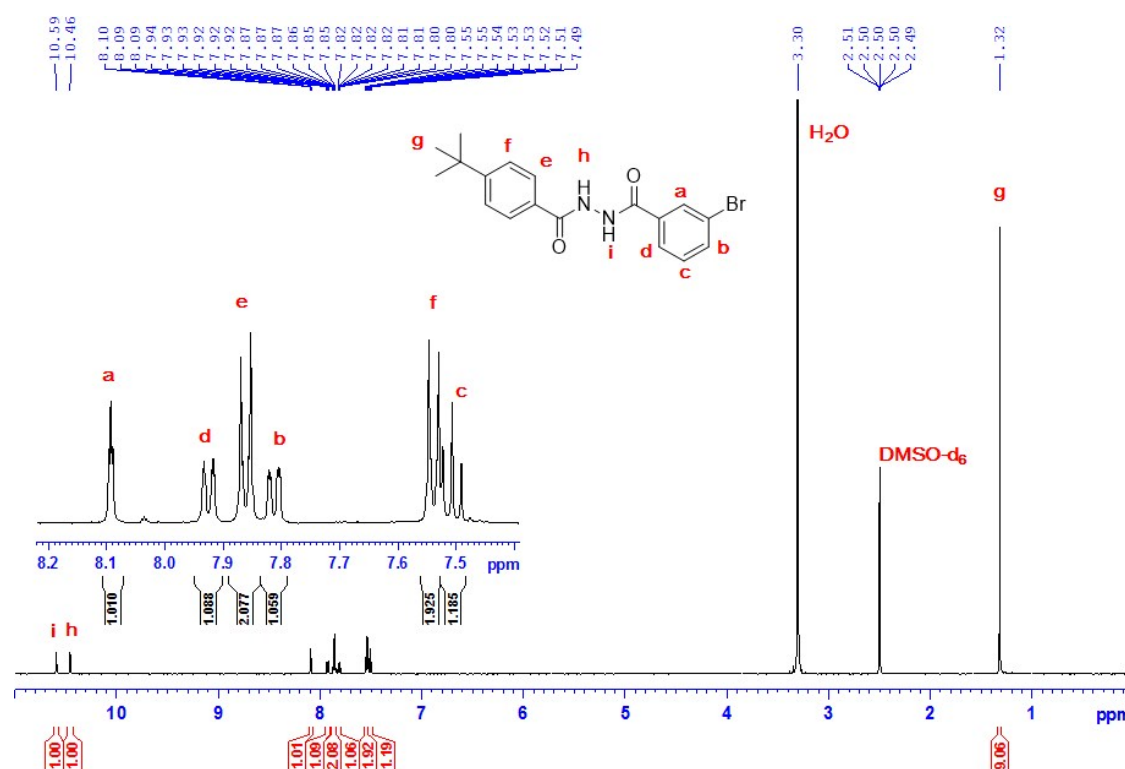

Fig. S1 <sup>1</sup>H NMR spectrum of compound 3.

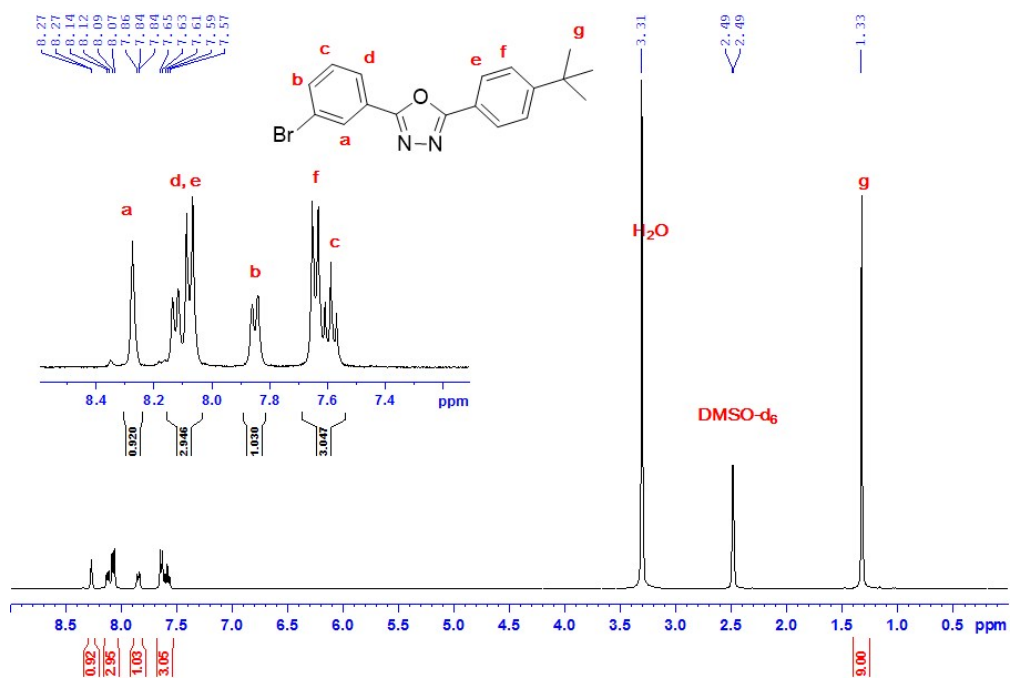

Fig. S2 <sup>1</sup>H NMR spectrum of compound 4.

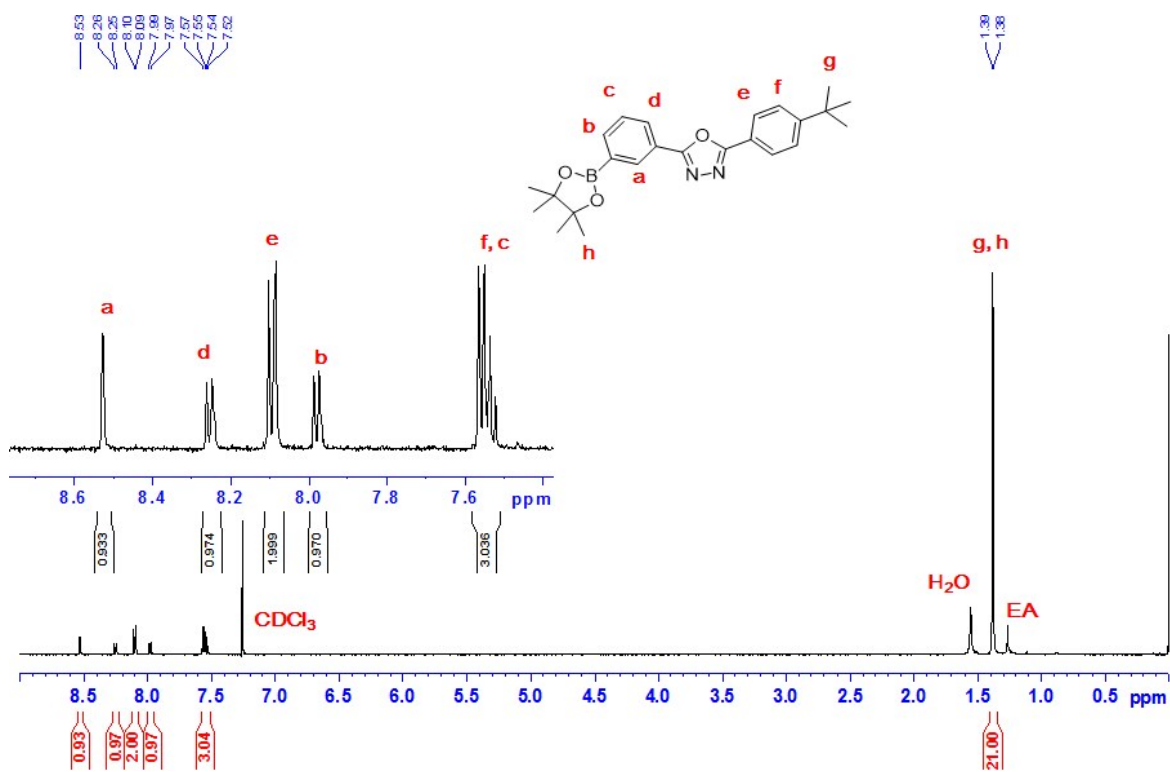

Fig. S3 <sup>1</sup>H NMR spectrum of compound 6.

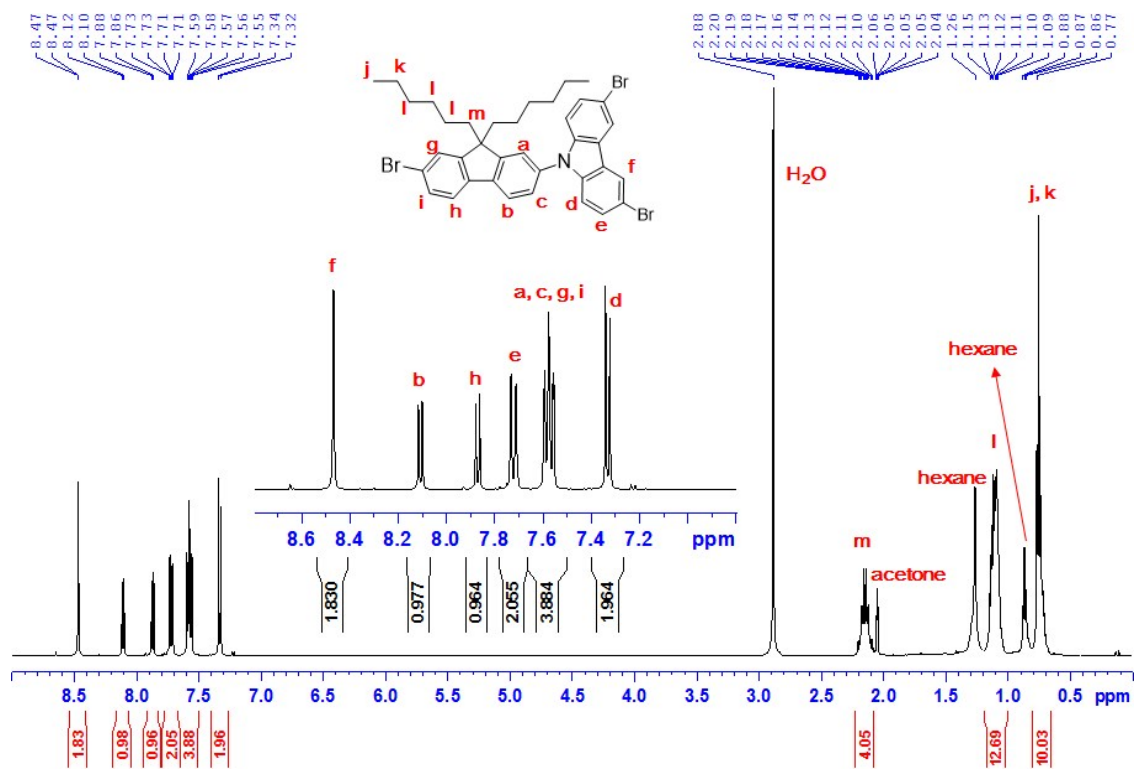

Fig. S4  $^1\text{H}$  NMR spectrum of compound 9.

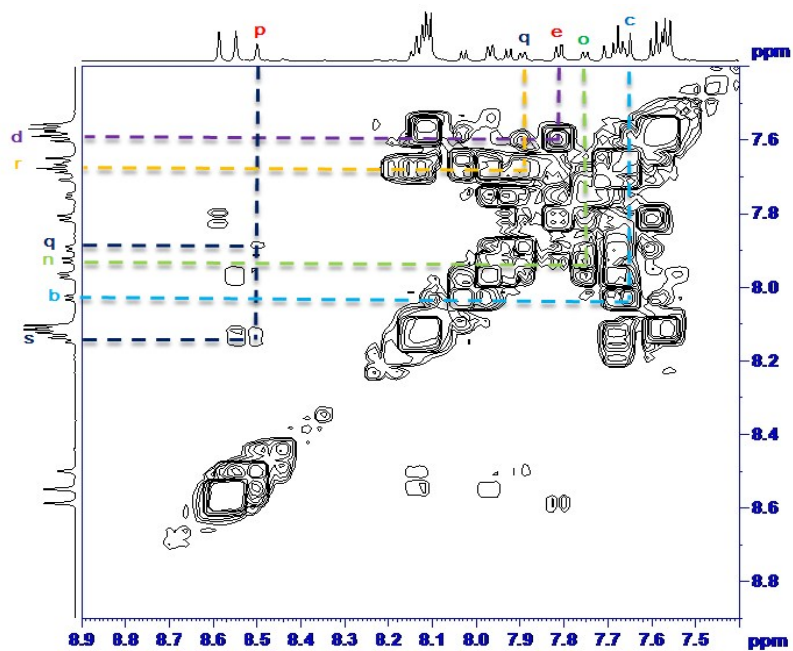

Fig. S5.  $^1\text{H}$  COSY spectrum of FC30.

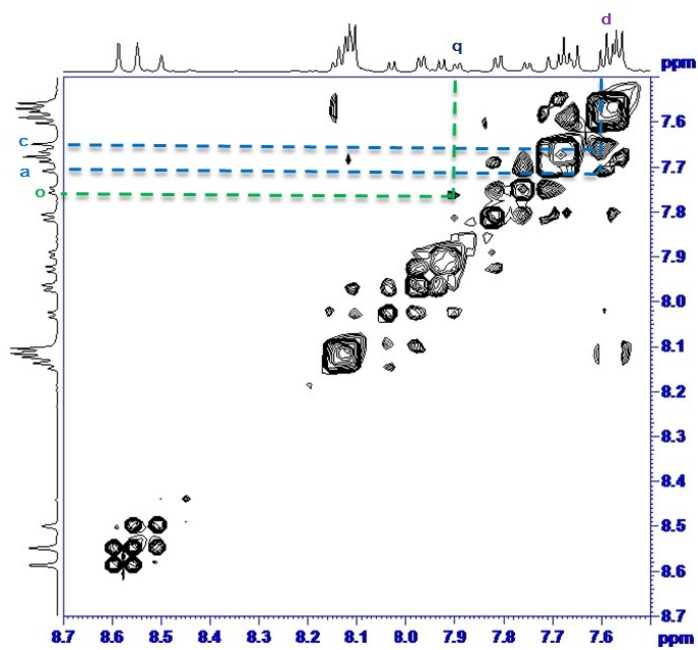

Fig. S6. NOESY spectrum of FC3O.

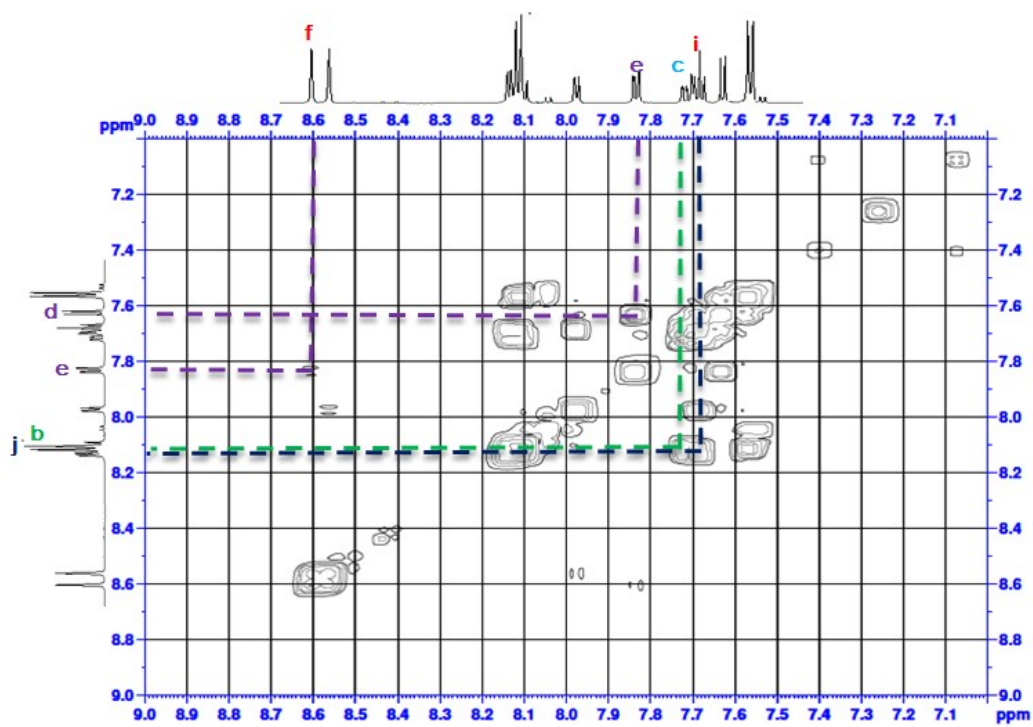

Fig. S7.  $^1\text{H}$  COSY spectrum of FC4O.

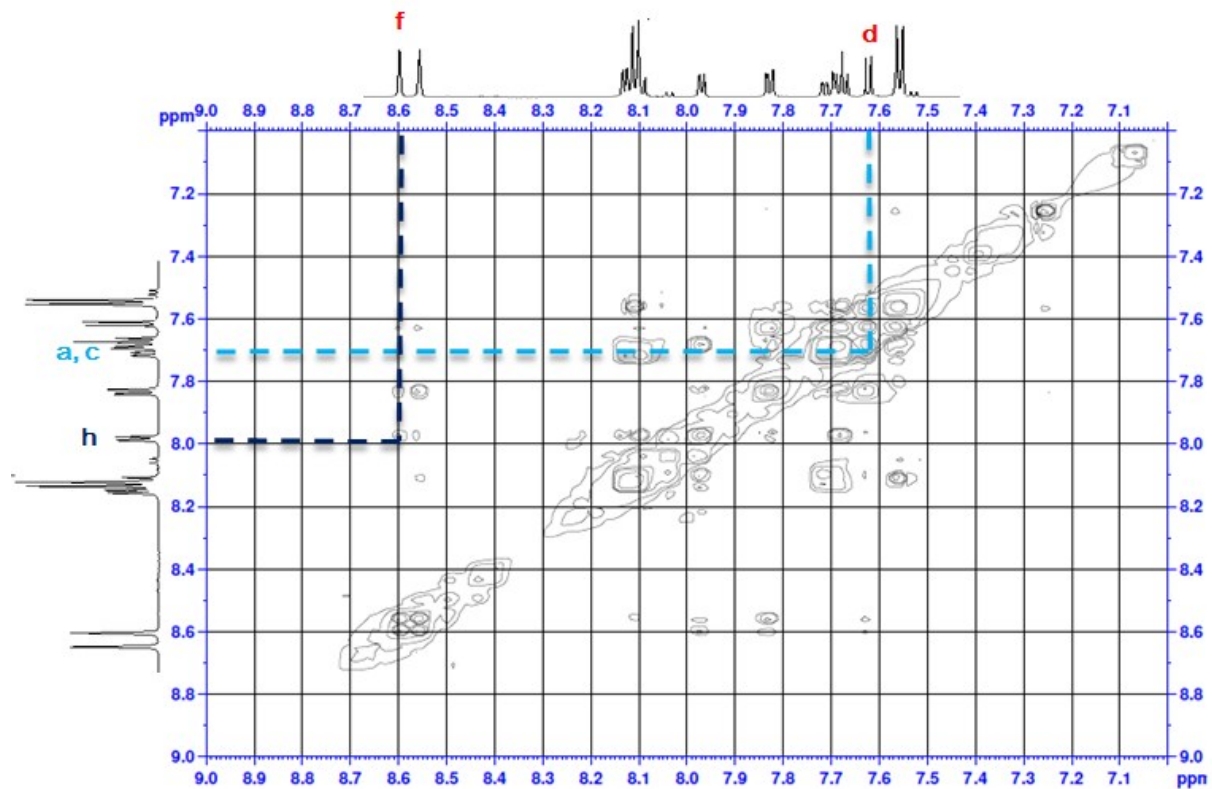

Fig. S8. NOESY spectrum of FC40.

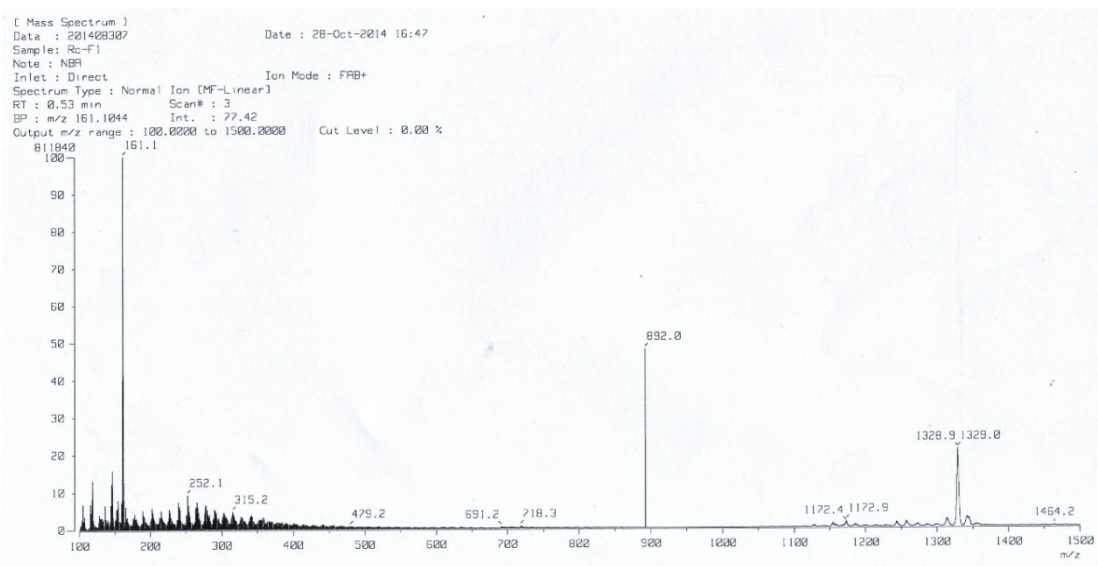

Fig. S9. Mass spectrum of FC30.

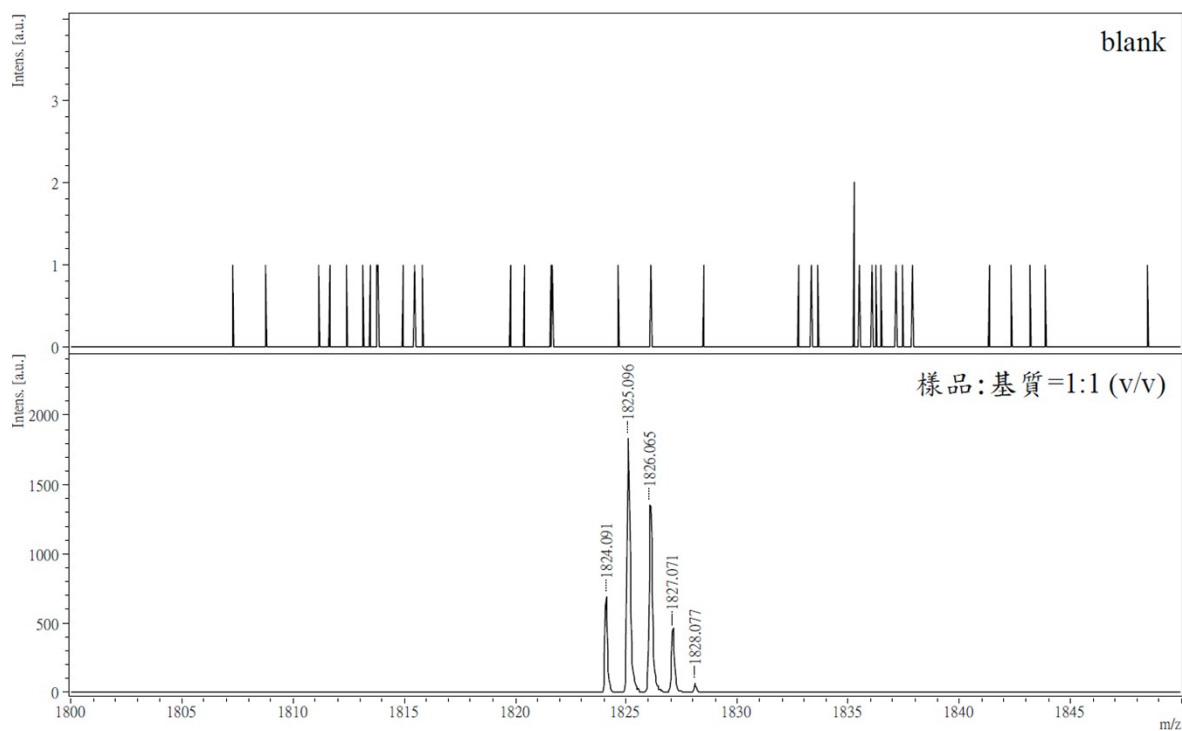

Fig. S10. Mass spectrum of **FC4O**.

Table S2. Electroluminescent properties of the devices with Ir(ppy)<sub>3</sub>-doped **FC3O** as emission layer (EML).<sup>a</sup>

| wt% Ir(ppy) <sub>3</sub><br>in <b>FC3O</b> | V <sub>on</sub> <sup>b</sup><br>(V) | L <sub>max</sub> <sup>c</sup><br>(cd/m <sup>2</sup> ) | LE <sub>max</sub> <sup>d</sup><br>(cd/A) |
|--------------------------------------------|-------------------------------------|-------------------------------------------------------|------------------------------------------|
| 1.0                                        | 6.5                                 | 4,292                                                 | 4.8                                      |
| 2.0                                        | 7.1                                 | 9,358                                                 | 14.9                                     |
| 3.0                                        | 7.7                                 | 7,428                                                 | 9.4                                      |

<sup>a</sup> Device configuration: ITO/PEDOT:PSS/EML/BCP(25 nm)/LiF(1 nm)/Al(90 nm); the emission layer was spin-coated from toluene solution. <sup>b</sup> Turn-on voltage at 10 cd/m<sup>2</sup>. <sup>c</sup> Maximum luminance. <sup>d</sup> Maximum luminance efficiency.

Table S1. Electroluminescent properties of the devices with Ir(ppy)<sub>3</sub>-doped **FC40** as emission layer (EML).<sup>a</sup>

| wt% Ir(ppy) <sub>3</sub><br>in <b>FC40</b> | V <sub>on</sub> <sup>b</sup><br>(V) | L <sub>max</sub> <sup>c</sup><br>(cd/m <sup>2</sup> ) | LE <sub>max</sub> <sup>d</sup><br>(cd/A) |
|--------------------------------------------|-------------------------------------|-------------------------------------------------------|------------------------------------------|
| 0.5                                        | 7.1                                 | 5,242                                                 | 7.8                                      |
| 1.0                                        | 6.9                                 | 9,590                                                 | 9.1                                      |
| 1.5                                        | 7.3                                 | 10,232                                                | 18.2                                     |
| 2.0                                        | 8.0                                 | 13,582                                                | 12.0                                     |

<sup>a</sup> Device configuration: ITO/PEDOT:PSS/EML/BCP(25 nm)/LiF(1 nm)/Al(90 nm); the emission layer was spin-coated from toluene solution. <sup>b</sup> Turn-on voltage at 10 cd/m<sup>2</sup>. <sup>c</sup> Maximum luminance. <sup>d</sup> Maximum luminance efficiency.
